# Supplementary material
Source: publisher site journal article supplement (https://www.dovepress.com/get_supplementary_file.php?f=373117.docx)
Supplement: Supplementary file 1 [file get_supplementary_file.php]

**Supplementary Table**

**Demographics in SLE, SLE with cutaneous involvement, and CLE-only group**

| Characteristics | SLE or CLE, n (%) | | | *p*-value |
| --- | --- | --- | --- | --- |
| SLE without CLE (n = 225) | SLE with CLE (n = 162) | CLE-only (n = 27) |
| Age (years), mean (SD) | 46.2 (14.6) | 42.4 (13.4) | 51.9 (20.4) | 0.002*a |
| BMI, mean (SD) | 24.5 (5.5) | 24.4 (4.8) | 25.6 (5.0) | 0.258 |
| Sex, n (%) |  |  |  |  |
| -Female | 209 (93.0) | 153 (94.4) | 20 (74.1) | 0.001*c |
| -Female: Male | 13:1 | 17:1 | 2.8:1 |  |
| Duration of disease (years), median (IQR) | 12.0 (6.5-18.0) | 13.0 (8.0-18.0) | 1.5 (0-3.5) | <0.001*k |
| **Disease severity, damage severity and clinical characteristics** | | | | |
| CLE subtype, n (%) |  |  |  | n/a |
| -ACLE | n/a | 86 (53.1) | - |  |
| -SCLE | n/a | 5 (3.1) | 1 (3.7) |  |
| -CCLE |  |  |  |  |
| DLE | n/a | 110 (67.9) | 17 (63.0) |  |
| Lupus tumidus | n/a | 3 (1.9) | 11 (40.7) |  |
| Lupus panniculitis | n/a | 3 (1.9) | 2 (7.4) |  |
| SLEDAI-2K score, n (%) |  |  |  |  |
| -SLEDAI = 0 | 133 (75.6) | 109 (76.8) | n/a | 0.200 |
| -SLEDAI 1-3 | 10 (5.7) | 14 (9.9) | n/a |  |
| -SLEDAI > 3 | 33 (18.8) | 19 (13.4) | n/a |  |
| SLICC/ACR-DI |  |  |  |  |
| Median (IQR) | 1 (0.0-2.0) | 1 (0.0-1.0) | n/a | 0.071 |
| = 0, n (%) | 84 (38.4) | 68 (43.6) | n/a | 0.362 |
| ≥1, n (%) | 135 (61.6) | 88 (56.4) | n/a |  |
| Lupus nephritis, n (%) | 95 (42.4) | 53 (33.1) | n/a | 0.082 |
| **Laboratory findings** | | | | |
| Proteinuria** n (%) | 35 (20.0) | 12 (9.0) | 0 (0.0) | 0.009*c |
| AST (U/L), mean (SD) | 26.6 (10.6) | 25.9 (9.4) | 26.7 (8.2) | 0.842 |
| **Treatment (s)** | | | | |
| Prednisolone, n (%) | 141 (63.2) | 110 (69.2) | 2 (7.7) | <0.001*c |
| -Cumulative dose in 3 month (g), median (IQR) | 0.5 (0.2-0.9) | 0.5 (0.2-0.7) | n/a | 0.756 |
| Immunosuppressive drug, n (%) | 122 (54.7) | 98 (60.9) | 2 (11.1) | <0.001*c |
| Hydroxychloroquine, n (%) | 155 (69.2) | 122 (75.8) | 15 (55.6) | 0.072 |
| -Cumulative dose in 3 month (g), median (IQR) | 7.8 (0.0-18.0) | 9 (1.3-18.0) | 9 (0.0-18.0) | 0.333 |
| Vitamin D supplement, n (%) | 169 (76.5) | 137 (84.6) | 7 (25.9) | <0.001*c |
| -Weekly dose (IU), median (IQR) | 20,000 (20000-20000) | 20,000 (20000-40000) | 0 (0-10000) | <0.001*k |
| -Cumulative dose in 3 month (million.IU), median (IQR) | 0.3 (0.2-0.3) | 0.3 (0.3-0.5) | 0 (0-0.1) | <0.001*k |
| Calcium supplement, n (%) | 166 (77.2) | 132 (83.0) | 1 (3.7) | <0.001*c |
| -Daily dose (g), median (IQR) | 1.2(0.6-1.3) | 1.2(0.6-1.3) | 0 (0.0-0.0) | <0.001*k |
| -Cumulative dose in 3 month (g), median (IQR) | 108 (54.0-112.5) | 108 (54.0-112.5) | 0 (0.0-0.0) | <0.001*k |
|  | | | | |

**Abbreviation:** *AST*: Aspartate Aminotransferase; *BMI:* body mass index; *CCLE*: chronic cutaneous lupus erythematosus; *CLE*: cutaneous lupus erythematosus; *DLE*: discoid lupus erythematosus; *g*: gram;  *IQR*: Interquartile range; *IU*: international unit; *SCLE*: subacute cutaneous lupus erythematosus; *SD:* Standard deviation; *SLE*: systemic lupus erythematosus; *SLEDAI-2K*: Systemic Lupus Erythematosus Disease Activity Index 2000; *SLICC/ACR-DI*: Systemic lupus international collaborating clinics American College of Rheumatology Damage index.

*a Statistically significant (*p* < 0.05) using ANOVA; *k Statistically significant using Kruskal-Wallis test; *C Statistically significant using Chi-square test.

**Proteinuria was defined as more than 0.5 g per 24 hours by 24 hour-old urine or equivalent spot urine protein-to-creatinine ratio.
